# Supplementary material
Source: ML conference proceedings conference paper supplement (https://openreview.net/forum?id=VShuGzpK61)

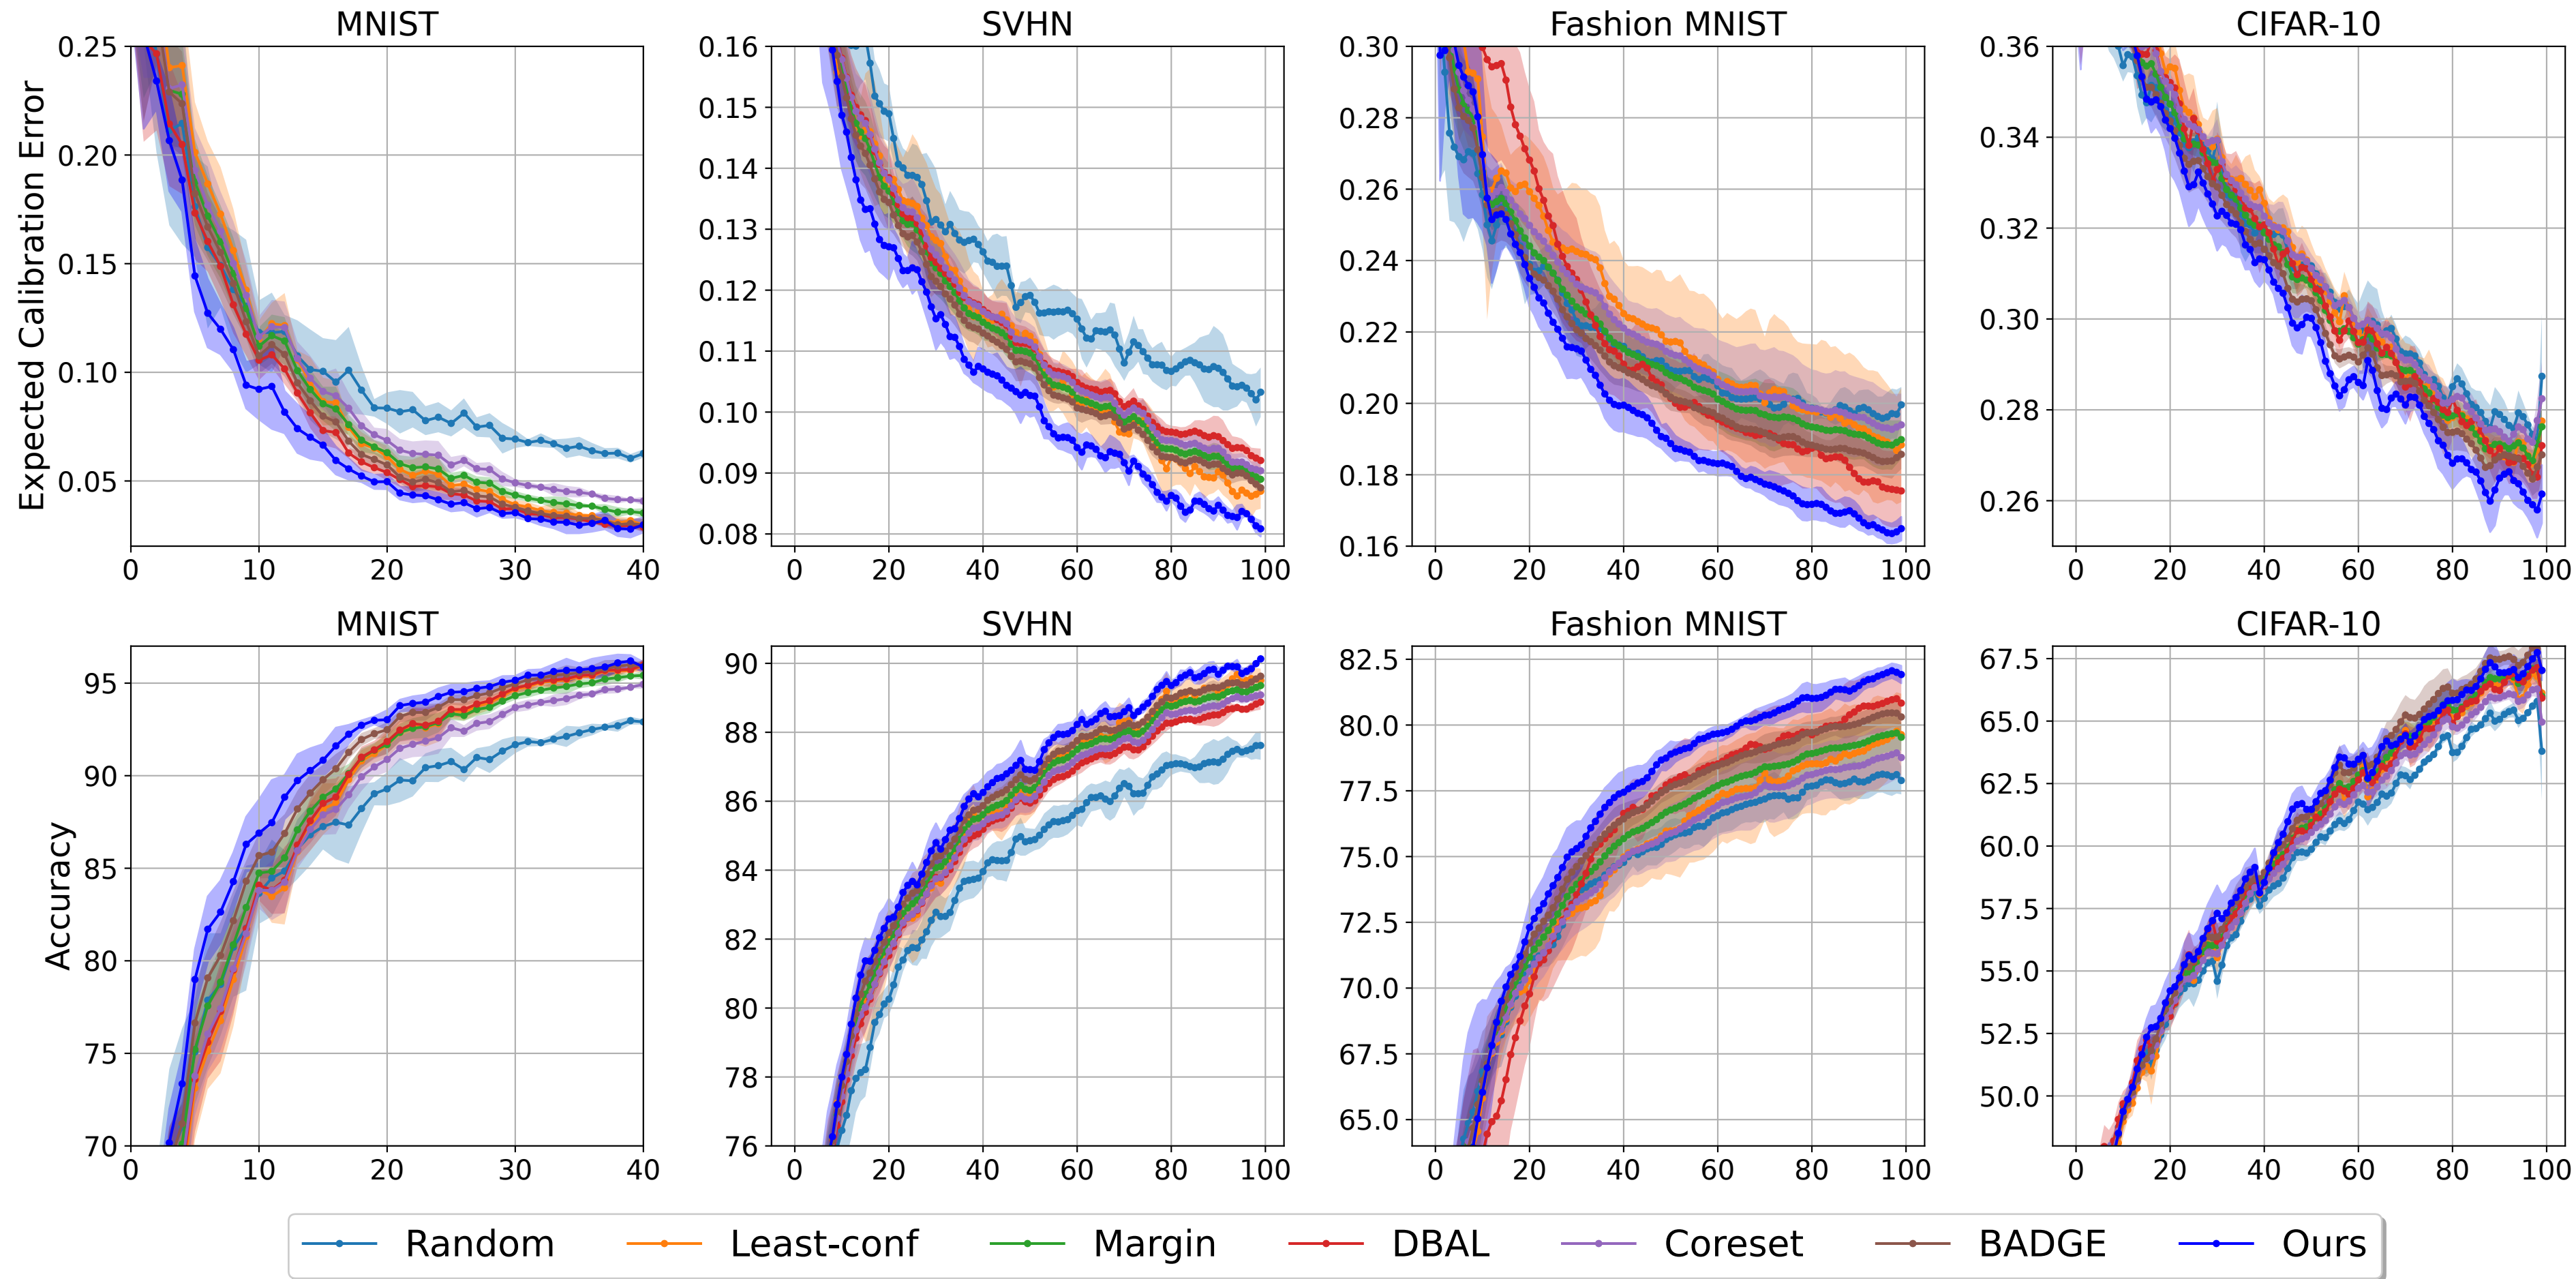

Supplement: supplementary_material [file main_fig.pdf › source_code/main_fig.pdf]
